# Supplementary material for: An ionic liquid crystal-based solid polymer electrolyte with desirable ion-conducting channels for superior performance ambient-temperature lithium batteries
Source: Royal Society of Chemistry journal article supplement (doi:10.1039/c8py00951a), 2018-01-01
Supplement: c8py00951a1.pdf [file c8py00951a1.pdf]

## Supporting Information

# Ionic Liquid Crystal-based Solid Polymer Electrolyte with Desirable Ion-conducting Channels for Superior Performance Ambient-temperature Lithium Batteries

Shi Wang, Xu Liu, Ailian Wang, Zhinan Wang, Jie Chen, Qinghui Zeng, Liaoyun Zhang\*, Xuefei Wang\*

School of Chemical Sciences, University of Chinese Academy of Sciences, Beijing 100049, China

Emails: zhangly@ucas.ac.cn; wangxf@ucas.ac.cn

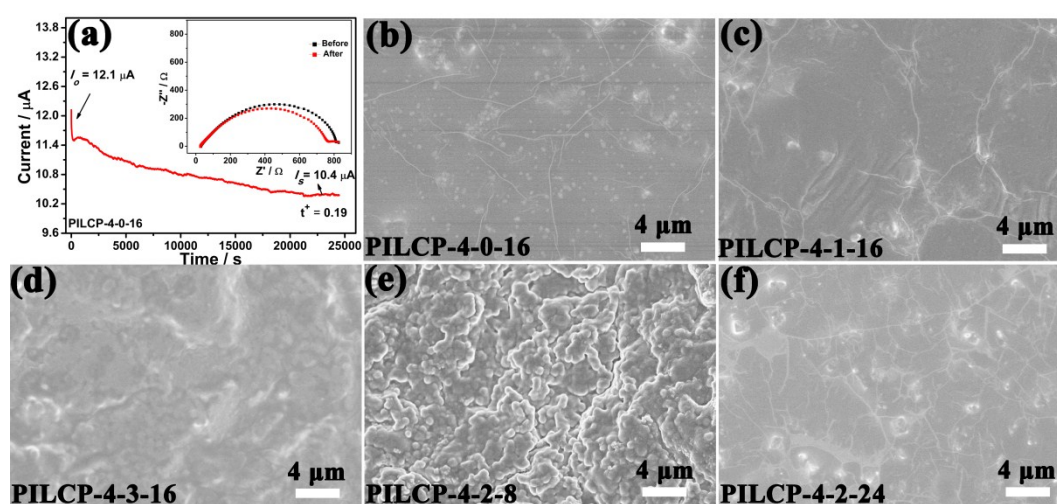

**Figure S1.** (a) The chronoamperometry of Li/PILCP-4-0-16/Li cell at a potential step of 10 mV (60 °C) (the insets show the AC impedance spectra before and after polarization at 60 °C). (b), (c), (d), (e) and (f) show the SEM images of corresponding ILC-based electrolytes, respectively.

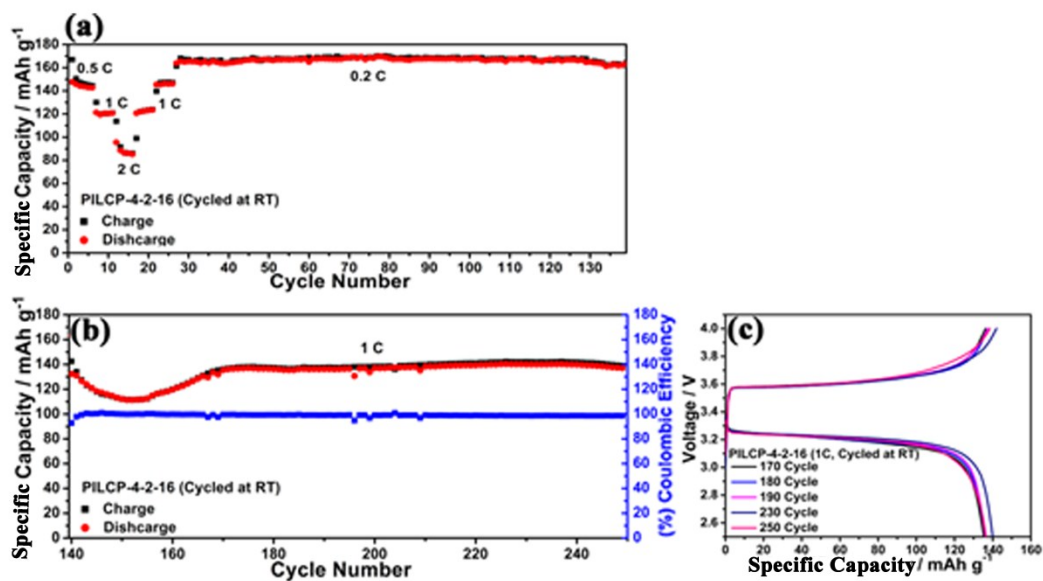

**Figure S2.** (a) The cycle performance of the LFP/PILCP-4-2-16/Li battery during galvanostatic cycling at 0.2, 0.5, 1 and 2 C. (b) Long cycle performance at 1 C for the solid-state LFP-based cell after the cell cycled at different current density (continuation of Figure S2a). (c) charge and discharge curves of the LFP/PILCP-4-2-16/Li cell at different cycles at 1C. The experiment was conducted at RT.

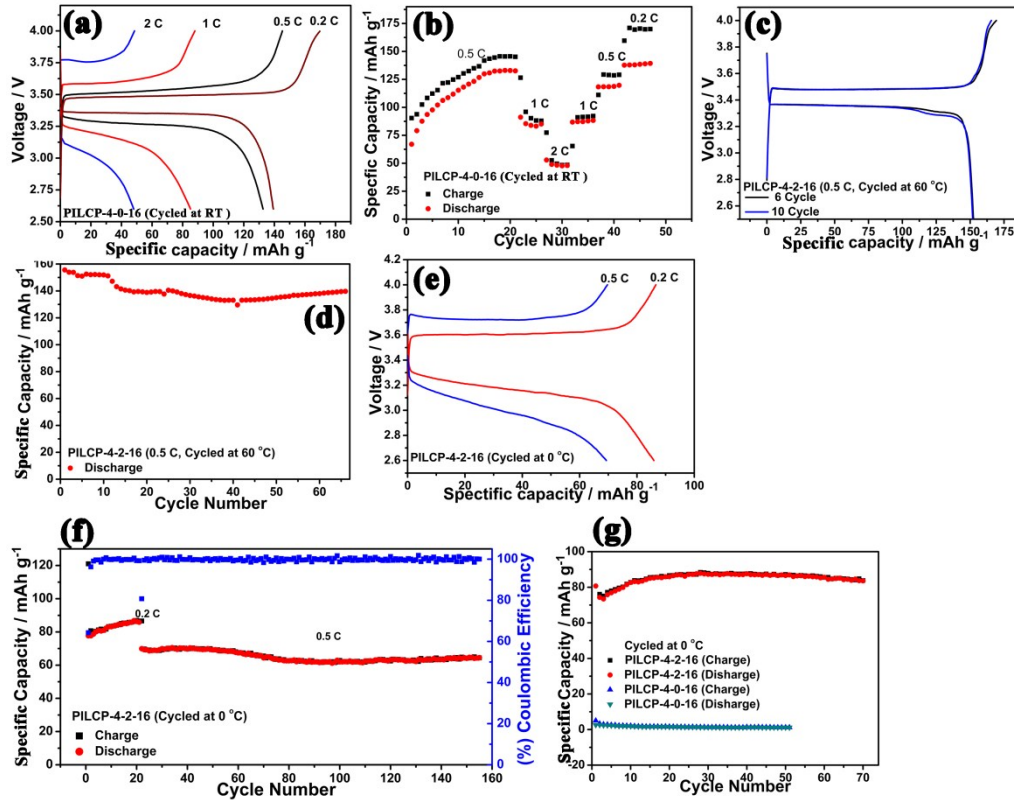

**Figure S3.** (a) Charge/discharge curves of LFP/PILCP-4-0-16/Li cell at different C-rates at RT. (b) The cycle performance of the Li/PILCP-4-0-16/LFP battery during galvanostatic cycling at 0.2, 0.5, 1 and 2 C at RT. (c) Charge/discharge curves of LFP/PILCP-4-2-16/Li cell at 0.5 C at 60 °C. (d) Cycle performance at 0.5 C for the solid-state LFP/Li cell based on PILCP-4-2-16 (cycled at 60 °C). (e) Charge/discharge curves of LFP/PILCP-4-2-16/Li cell at different C-rates (cycled at 0 °C). (f) The cycle performance of the Li/PILCP-4-2-16/LFP cell during galvanostatic cycling at 0.2 and 0.5 C (cycled at 0 °C), the coulombic efficiency is close to 100% in the whole cycling (155 cycles). (g) The cycle performance of the Li/PILCP-4-0-16/LFP and Li/PILCP-4-2-16/LFP cells during galvanostatic cycling at 0.2 C (cycled at 0 °C).

**Table S1.** the VTF fitting-papameters of ILC-based SSEs.

| Samples      | A ( $\text{S}^{-1} \text{cm}^{-1} \text{K}^{-1/2}$ ) | $E_a$ ( $\text{kJ mol}^{-1}$ ) | $T_o$ (K) |
|--------------|------------------------------------------------------|--------------------------------|-----------|
| PILCP-4-0-16 | 5.29                                                 | 7.32                           | 166.22    |
| PILCP-4-1-16 | 16.34                                                | 8.57                           | 161.46    |
| PILCP-4-2-16 | 2.65                                                 | 6.68                           | 165.89    |
| PILCP-4-3-16 | 15.99                                                | 9.27                           | 164.58    |
| PILCP-4-2-8  | 9.48                                                 | 9.30                           | 168.10    |
| PILCP-4-2-24 | 32                                                   | 9.53                           | 163.63    |
